# Supplementary material for: Stabilizing oil–oil interfaces with mixed-shell polymeric nanoparticles prepared via PISA and the grafting combination
Source: Royal Society of Chemistry journal article supplement (doi:10.1039/d3sm00287j), 2023-01-01
Supplement: d3sm00287j1.pdf [file d3sm00287j1.pdf]

## **Electronic Supplementary information for**

*Stabilizing oil-oil interfaces with mixed-shell polymeric nanoparticles prepared by PISA and the grafting combination*

*Xi Zhao<sup>a,b</sup>, Jiani Peng<sup>a</sup>, Liangliang Shi<sup>a</sup>, Guoxiang Wang<sup>\*b</sup>, Yong Gao<sup>\*a</sup>*

*<sup>a</sup>Jiangsu Key Laboratory of Environmentally Friendly Polymeric Materials, Jiangsu Collaborative Innovation Centre of Photovoltaic Science and Engineering, School of Materials Science and Engineering, Changzhou University, Changzhou, 213164, Jiangsu Province, China*

*<sup>b</sup>College of Chemistry and Chemical Engineering, Hunan Institute of Science and Technology, Yueyang 414006, Hunan Province, China*

\* Corresponding Author: [wxwzl@163.com](mailto:wgxwzl@163.com) and [gydx.1027@163.com](mailto:gydx.1027@163.com)

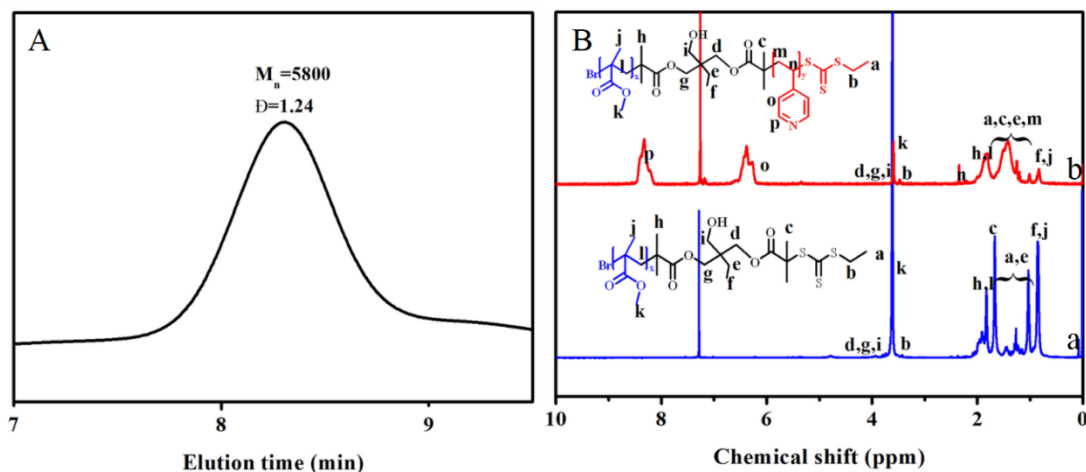

Fig. S1. (A) GPC traces of PMMA<sub>24</sub>-CTA; (B) Typical <sup>1</sup>H NMR spectra of PMMA-CTA and PMMA-*b*-P4VP copolymers recorded in CDCl<sub>3</sub>

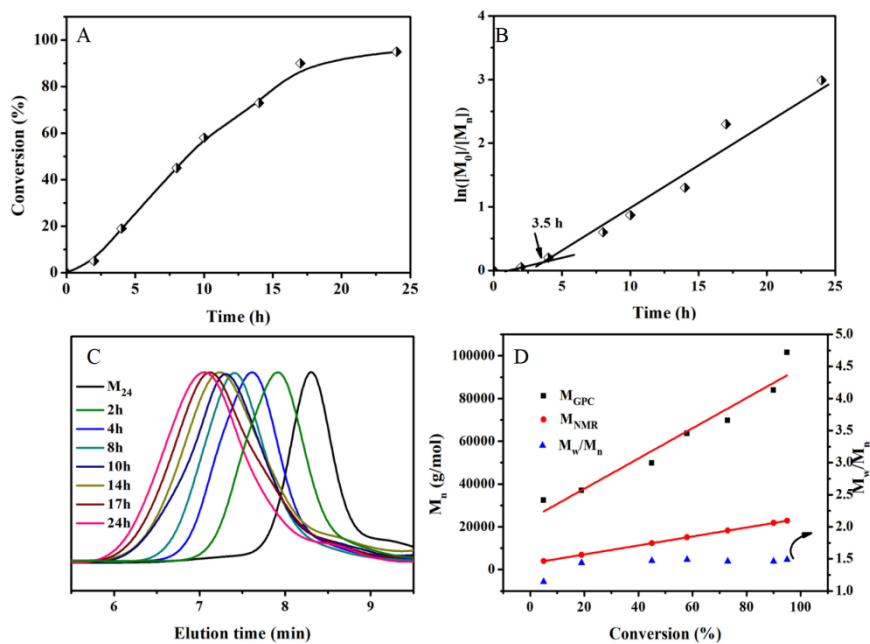

Fig. S2. (A) Monomer conversion vs. time plot; (B)  $\ln([M]_0/[M])$  vs. time plot for RAFT dispersion polymerization of 4VP mediated by PMMA<sub>24</sub>; (C) GPC traces of PMMA<sub>24</sub>-*b*-P4VP<sub>x</sub> copolymers with different DP<sub>n</sub> of P4VP block; (D) M<sub>n</sub>s and dispersities of PMMA<sub>24</sub>-*b*-P4VP<sub>x</sub> copolymers; Polymerization reaction conditions: [4VP]<sub>0</sub>/PMMA<sub>24</sub>/[AIBN]<sub>0</sub> = 1000/5/1; Temperature: 65 °C; Solid content: 20 wt% (w/w)

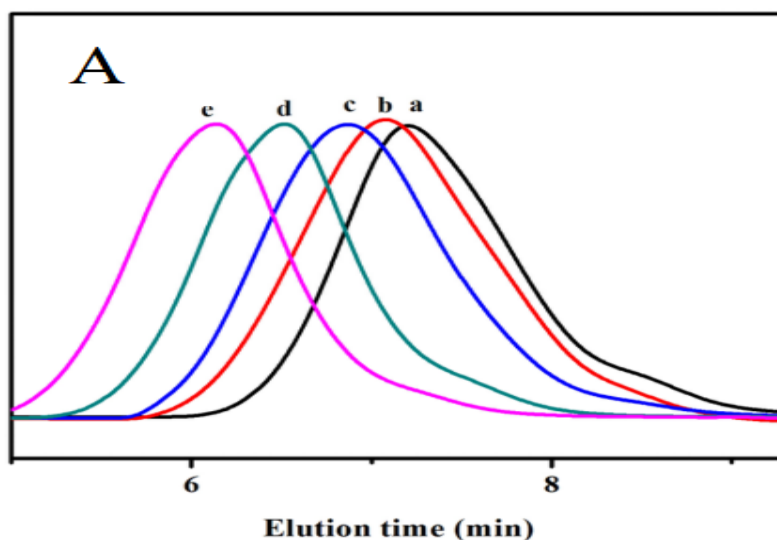

Fig. S3. (A) GPC traces of  $\text{PMMA}_{24}\text{-}b\text{-P4VP}_x$  copolymers with different DPs of P4VP block (a:  $x = 270$ ; b:  $x = 376$ ; c:  $x = 450$ ; d:  $x = 510$ ; e:  $x = 900$ )

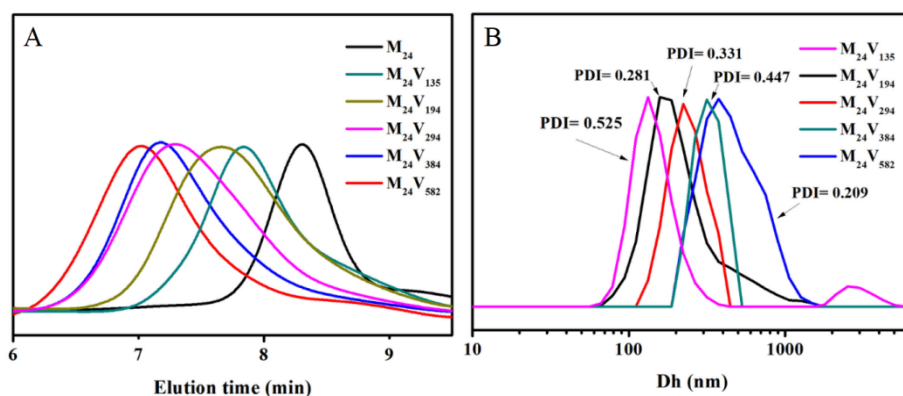

Fig. S4. (A) GPC traces of  $\text{PMMA}_{24}\text{-}b\text{-P4VP}_x$  copolymers with different DPs of P4VP block produced at 30 wt% solid; (B) DLS traces of  $\text{M}_{24}\text{V}_x$  with different DPs of P4VP block at 30 wt% solid

**Table S1.** The summarized results of linear  $\text{PMMA}_{24}\text{-P4VP}_x$  block copolymers and nanoparticles prepared by  $\text{PMMA}_{24}\text{-CTA}$  mediated dispersion polymerization of 4-

## VP at different conditions

| Targeted DP<br>(P4VP block) | Solid<br>wt% | Conv.<br>(%) | calc. DP<br>(P4VP block) | M <sub>n,NMR</sub><br>(PMMA-P4VP) | W <sub>philic</sub> | Morph. <sup>a</sup> |
|-----------------------------|--------------|--------------|--------------------------|-----------------------------------|---------------------|---------------------|
| 300                         | 10           | 97           | 291                      | 33443                             | 0.073               | S                   |
| 400                         | 10           | 98           | 393                      | 44153                             | 0.055               | S                   |
| 500                         | 10           | 93           | 465                      | 51713                             | 0.047               | S                   |
| 200                         | 20           | 58           | 116                      | 15068                             | 0.203               | S                   |
| 200                         | 20           | 73           | 146                      | 18218                             | 0.135               | S                   |
| 200                         | 20           | 90           | 180                      | 21788                             | 0.113               | W                   |
| 200                         | 20           | 95           | 190                      | 22838                             | 0.107               | W                   |
| 300                         | 20           | 90           | 270                      | 31238                             | 0.078               | W                   |
| 500                         | 20           | 90           | 450                      | 50138                             | 0.048               | W                   |
| 1000                        | 20           | 92           | 920                      | 99488                             | 0.024               | W                   |
| 150                         | 30           | 90           | 135                      | 17063                             | 0.145               | S+V                 |
| 200                         | 30           | 97           | 194                      | 23258                             | 0.105               | S+W+V               |
| 400                         | 30           | 96           | 384                      | 43208                             | 0.056               | V                   |

<sup>a</sup> S: sphere; W: worm; V: vesicle.

### S5. Evaluation of the hydroxyl reaction efficiency

The reaction efficiency of hydroxyl groups with C<sub>18</sub>NCO is roughly calculated according to the following equation:

$$\frac{\left(\frac{m}{M} - a\right) \times n \times 14 + a \times (n + 1) \times 14}{m + 295.5 \times a} = 11.46 \% \quad (1)$$

$$c = \frac{a}{m/M} \times 100\% \quad (2)$$

m is the weight of M<sub>24</sub>V<sub>180</sub> polymeric samples, M is the average molecular weight of PMMA<sub>24</sub>-b-P4VP<sub>180</sub>, a is the supposed mole number of hydroxyl groups participating

the grafting reaction,  $n$  is the degree of polymerization of P4VP block of PMMA<sub>24</sub>-*b*-P4VP<sub>180</sub> diblock copolymers, and  $c$  is the reaction efficiency of hydroxyl groups.

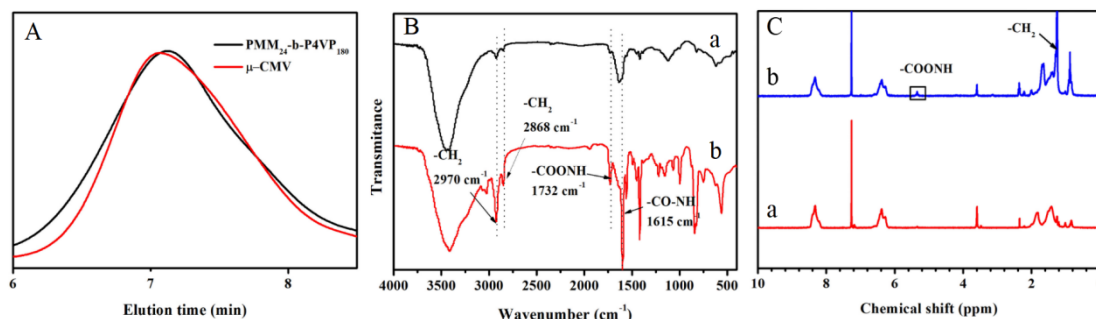

Fig. S6 (A) GPC traces of PMMA<sub>24</sub>-*b*-P4VP<sub>180</sub> and  $\mu$ -C<sub>18</sub>-PMMA<sub>24</sub>-P4VP<sub>180</sub> ( $\mu$ -CMV) recorded in DMF; (B) FT-IR spectra of M<sub>24</sub>V<sub>180</sub> worms before (a) and after (b) the grafting of C<sub>18</sub> alkyl chains; (C) <sup>1</sup>H NMR spectra of PMMA<sub>24</sub>-*b*-P4VP<sub>180</sub> (a) and  $\mu$ -C<sub>18</sub>-PMMA<sub>24</sub>-P4VP<sub>180</sub> copolymers (b) recorded in *d*-CHCl<sub>3</sub>;

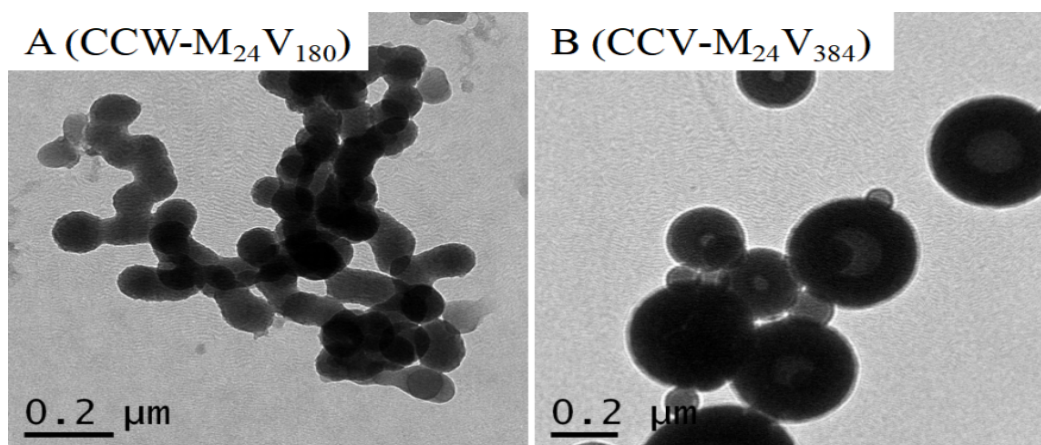

Fig. S7. Representative TEM images of CCW-M<sub>24</sub>V<sub>180</sub> (A) and CCV-M<sub>24</sub>V<sub>384</sub> (B) originated from their dispersions in DMSO

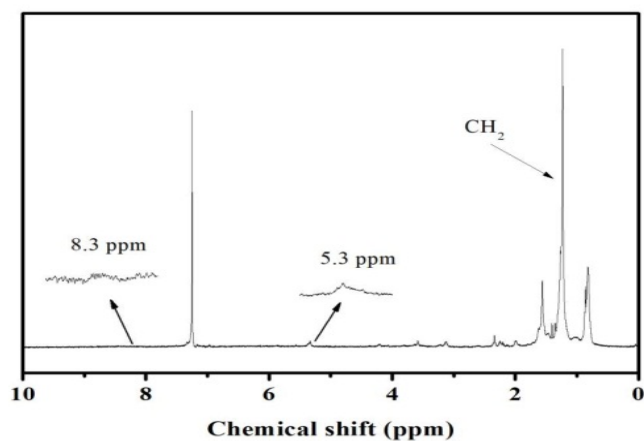

Fig. S8.  $^1\text{H}$  NMR spectrum of CCW- $\text{C}_{18}/\text{M}_{24}\text{V}_{180}$  recorded in  $d\text{-CHCl}_3$

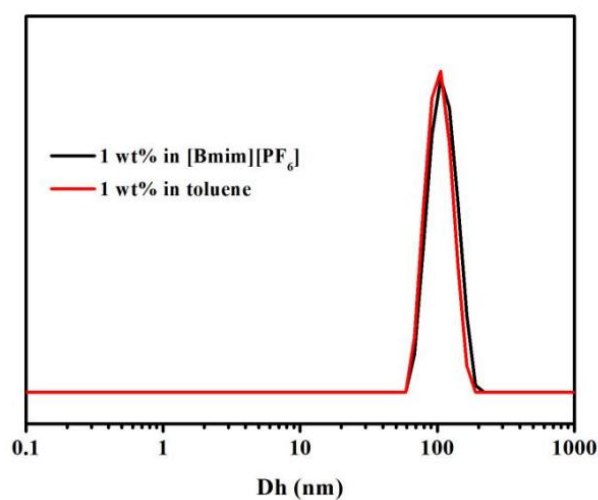

Fig. S9. DLS traces of  $\text{C}_{18}/\text{M}_{24}\text{V}_{384}\text{-S}$  nanoparticles dispersed in toluene and  $[\text{Bmim}][\text{PF}_6]$  at 1.0 wt%

#### S10. The preparation of $\text{C}_{18}/\text{M}_{24}\text{V}_{384}\text{-CCS}$

In a typical reaction, 5 mL of  $\text{C}_{18}/\text{M}_{24}\text{V}_{384}$  toluene dispersion (containing 10 mg of  $\text{C}_{18}/\text{M}_{24}\text{V}_{384}$  sample) and 15 mL of toluene were added into a 25 mL of round bottom flask. Then, 6 mg of DBB (0.03 mmol) was added. The mixtures were stirred at room temperature. After 24 h, the reaction was stopped. After the centrifugation, the supernatant was separated. The dispersion and the centrifugation operations were then

repeatedly conducted for three times. The resulting samples were re-dispersed in toluene.

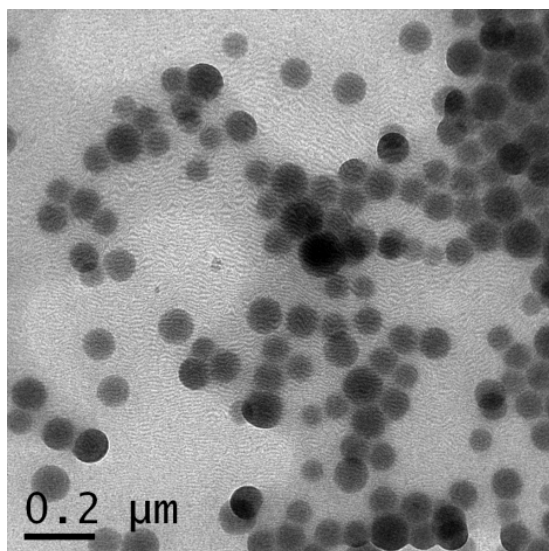

Fig. S10. Typical TEM image of  $C_{18}/M_{24}V_{384}$ -CCS, and TEM sample was prepared by depositing a drop of diluted DMSO suspension onto a carbon-coated copper grid

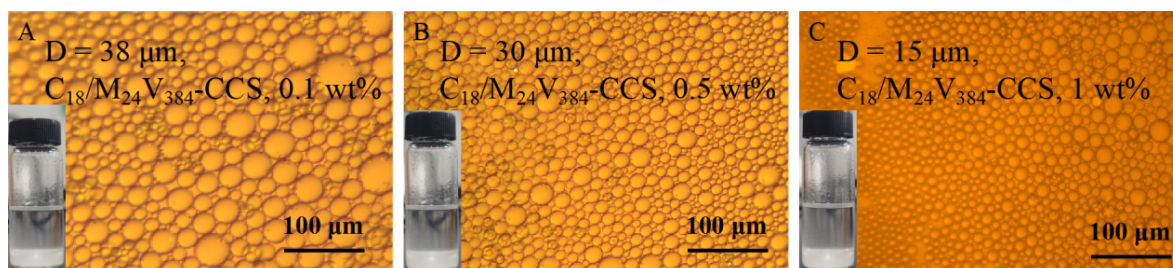

Fig. S11. Optical microscopy images and photographs of  $[\text{Bmim}][\text{PF}_6]$ -in-toluene Pickering emulsions stabilized by  $C_{18}/M_{24}V_{384}$ -CCS at different concentrations (A: 0.1 wt%; B: 0.5 wt%; C: 1 wt%)



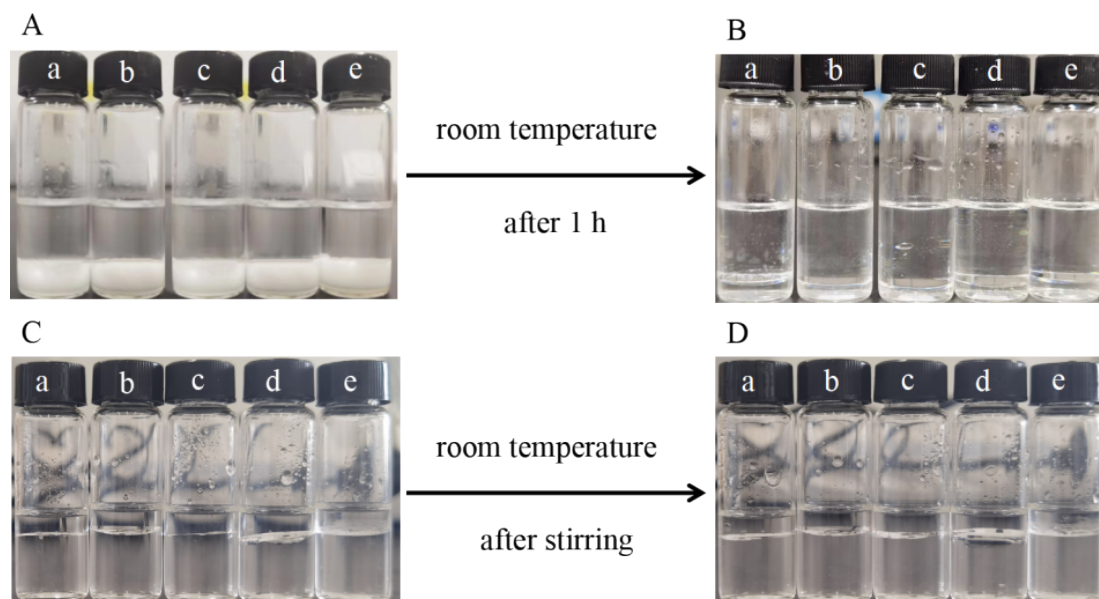

Fig. S12. Emulsifying results of [Bmim][PF<sub>6</sub>]/toluene biphases in the presence of 0.5 wt% of CCW-M<sub>24</sub>V<sub>180</sub>, CCV-M<sub>24</sub>V<sub>384</sub>, M<sub>24</sub>V<sub>116</sub>, M<sub>24</sub>V<sub>180</sub>, M<sub>24</sub>V<sub>384</sub>; Polymeric nanoparticles were initially dispersed in either toluene (A, B) or [Bmim][PF<sub>6</sub>] (C, D)

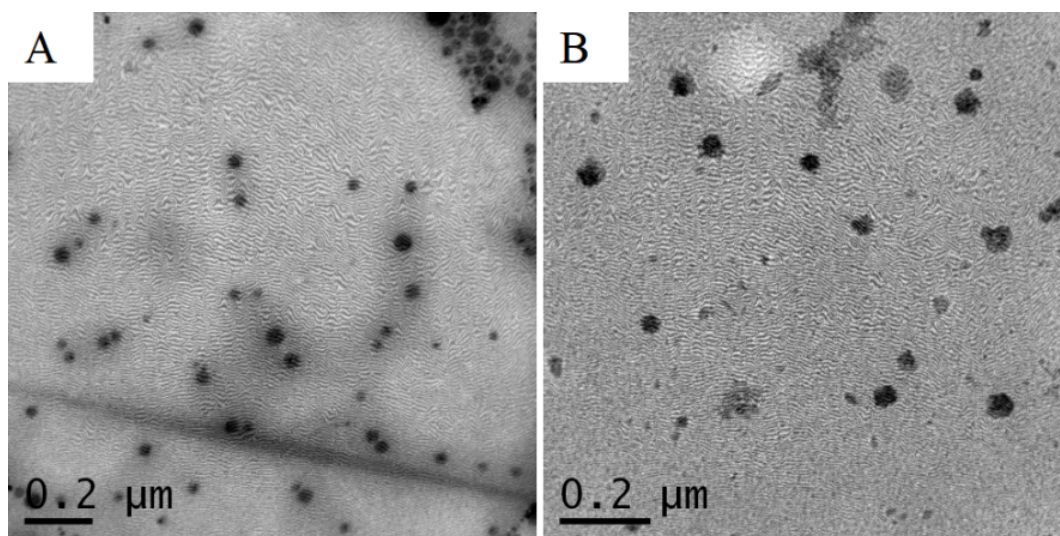

Fig. S13. TEM images of the initial M<sub>24</sub>V<sub>180</sub> worms (A) and M<sub>24</sub>V<sub>384</sub> (B) vesicles dispersed in toluene after 1 min of homogenization at 14000 rpm
